# Supplementary material for: A star-shaped amphiphilic block copolymer with dual responses: synthesis, crystallization, self-assembly, redox and LCST–UCST thermoresponsive transition
Source: Royal Society of Chemistry journal article supplement (doi:10.1039/c6py00702c), 2016-01-01
Supplement: c6py00702c1.pdf [file c6py00702c1.pdf]

Electronic Supplementary Information for:

**Star-shaped amphiphilic block copolymer with dual responses:  
synthesis, crystallization, self-assembly, redox and LCST-UCST  
thermoreponsive transition**

*Hua Yuan, Hai Chi and Weizhong Yuan\**

*School of Materials Science and Engineering, Key Laboratory of Advanced Civil  
Materials of Ministry of Education, Tongji University, 201804, People's Republic of  
China*

*Synthesis of Linear PCL*

CL (5.136 g, 45 mmol), benzyl alcohol (0.108 g, 1 mmol), and a catalytic amount of Sn(Oct)<sub>2</sub> (45 μmol) were added to a fire-dried polymerization tube quickly. The tube was then connected to a Schlenk line, where exhausting-refilling processes were repeated for three times. The tube was put into an oil bath at 115 °C under argon atmosphere with stirring and cooled to room temperature after polymerization for 24 h. The resulting product was dissolved in chloroform and precipitated two times in methanol. The purified polymer was dried in vacuum at room temperature.

$M_n=4960$  g/mol,  $M_w/M_n=1.32$
